# Supplementary material for: Modulating optical performance by phase transition in a nonlinear optical material β-Li2RbBi(PO4)2
Source: Royal Society of Chemistry journal article supplement (doi:10.1039/d3qi00828b), 2023-01-01
Supplement: d3qi00828b1.pdf [file d3qi00828b1.pdf]

## Supporting Information

### Modulating Optical Performance by Phase Transition in a Nonlinear Optical Material $\beta$ -Li<sub>2</sub>RbBi(PO<sub>4</sub>)<sub>2</sub>

Lei Wu,<sup>a</sup> Ruixin Zhang,<sup>b</sup> Qun Jing,<sup>\*b</sup> Hongyu Huang,<sup>a</sup> Xianmeng He,<sup>a</sup> Zhongchang Wang,<sup>\*c</sup> Zhaohui  
Chen<sup>\*a</sup>

<sup>a</sup> Key Laboratory of Oil & Gas Fine Chemicals, Ministry of Education and Xinjiang Uyghur Autonomous  
Region, School of Chemical Engineering and Technology, Xinjiang University, Urumqi 830017, China

<sup>b</sup> Xinjiang Key Laboratory of Solid State Physics and Devices, School of Physical Science and Technology,  
Xinjiang University, Urumqi 830017, China

<sup>c</sup> International Iberian Nanotechnology Laboratory (INL), Braga 4715-330, Portugal

\*To whom correspondence should be addressed. E-mails: chenzhaohui@xju.edu.cn (Z.H.C.);  
qunjing@xju.edu.cn (Q.J.); zhongchang.wang@inl.int (Z.C.W.)

---

## Contents

**Table S1.** Crystal data and structure refinement for the  $\beta$ -Li<sub>2</sub>RbBi(PO<sub>4</sub>)<sub>2</sub>

**Table S2.** Atomic coordinates, equivalent isotropic displacement parameters for the  $\beta$ -Li<sub>2</sub>RbBi(PO<sub>4</sub>)<sub>2</sub>

**Table S3.** Selected bond distances and angles for the  $\beta$ -Li<sub>2</sub>RbBi(PO<sub>4</sub>)<sub>2</sub>

**Table S4.** Anisotropic displacement parameters of the  $\beta$ -Li<sub>2</sub>RbBi(PO<sub>4</sub>)<sub>2</sub>

**Table S5.** Calculated bond valence values for the  $\beta$ -Li<sub>2</sub>RbBi(PO<sub>4</sub>)<sub>2</sub>

**Table S6.** SHG responses of all the Bi-based phosphates

**Figure S1.** XRD patterns of the Li<sub>2</sub>RbBi(PO<sub>4</sub>)<sub>2</sub>;

**Figure S2.** Atomic coordination environment of Bi in the  $\beta$ -Li<sub>2</sub>RbBi(PO<sub>4</sub>)<sub>2</sub>

**Figure S3.** The IR and UV-Vis-NIR diffuse reflectance spectra for the  $\beta$ -Li<sub>2</sub>RbBi(PO<sub>4</sub>)<sub>2</sub>

**Figure S4.** TG-DTA analysis of the  $\beta$ -Li<sub>2</sub>RbBi(PO<sub>4</sub>)<sub>2</sub>

Table S1. Crystal data and structure refinements for the  $\beta$ -Li<sub>2</sub>RbBi(PO<sub>4</sub>)<sub>2</sub>.

| Empirical formula                                            | Li <sub>2</sub> RbBi(PO <sub>4</sub> ) <sub>2</sub>             |
|--------------------------------------------------------------|-----------------------------------------------------------------|
| Formula weight                                               | 498.27                                                          |
| Temperature/K                                                | 273(2)                                                          |
| Wavelength/ Å                                                | 0.71073                                                         |
| Crystal system                                               | Monoclinic                                                      |
| Space group                                                  | <i>P</i> 2 <sub>1</sub>                                         |
| <i>a</i> /Å                                                  | 8.1067(3)                                                       |
| <i>b</i> /Å                                                  | 5.0152(2)                                                       |
| <i>c</i> /Å                                                  | 18.6456(7)                                                      |
| $\alpha$ /°                                                  | 90.00                                                           |
| $\beta$ /°                                                   | 91.0760(10)                                                     |
| $\gamma$ /°                                                  | 90.00                                                           |
| Volume/Å <sup>3</sup>                                        | 757.94(5)                                                       |
| Z, Calculated density/ (g/cm <sup>3</sup> )                  | 4, 4.376                                                        |
| Absorption coefficient / (mm <sup>-1</sup> )                 | 30.074                                                          |
| <i>F</i> (000)                                               | 880.0                                                           |
| Crystal size/mm <sup>3</sup>                                 | 0.17 × 0.058 × 0.025                                            |
| 2 $\theta$ range for data collection/°                       | 6.56 to 52                                                      |
| Index ranges                                                 | -9 ≤ <i>h</i> ≤ 9, -6 ≤ <i>k</i> ≤ 6, -22 ≤ <i>l</i> ≤ 22       |
| Reflections collected / unique                               | 10992 / 2961 [R(int) = 0.0376]                                  |
| Completeness to theta = 26.00                                | 99.6 %                                                          |
| Absorption correction                                        | 30.074                                                          |
| Refinement method                                            | Full-matrix least-squares on <i>F</i> <sup>2</sup>              |
| Data/restraints/parameters                                   | 2961/73/272                                                     |
| Goodness-of-fit on <i>F</i> <sup>2</sup>                     | 1.061                                                           |
| Final <i>R</i> indexes [ <i>I</i> ≥ 2 $\sigma$ ( <i>I</i> )] | <i>R</i> <sub>1</sub> = 0.0353, <i>wR</i> <sub>2</sub> = 0.0962 |
| Final <i>R</i> indexes [all data]                            | <i>R</i> <sub>1</sub> = 0.0374, <i>wR</i> <sub>2</sub> = 0.0974 |
| Extinction coefficient                                       | 0.00488(14)                                                     |
| Largest diff. peak/hole / e Å <sup>-3</sup>                  | 2.62/-3.04                                                      |

$$^a R_1 = \sum ||F_o| - |F_c|| / \sum |F_o| \text{ and } wR_2 = [\sum w(F_o^2 - F_c^2)^2 / \sum wF_o^4]^{1/2} \text{ for } F_o^2 > 2\sigma(F_o^2)$$

Table S2. Atomic coordinates ( $\times 10^4$ ) and equivalent isotropic displacement parameters ( $\text{\AA}^2 \times 10^3$ ) for the  $\beta$ - $\text{Li}_2\text{RbBi}(\text{PO}_4)_2$ .

| Atom   | x         | y         | z        | U(eq) |
|--------|-----------|-----------|----------|-------|
| Li(1)  | 4722(15)  | 8390(30)  | 5873(7)  | 7(1)  |
| Li(2)  | 11585(16) | 13380(30) | 7820(7)  | 10(1) |
| Li(3)  | 14532(16) | 13440(30) | 6938(7)  | 9(1)  |
| Li(4)  | 6660(20)  | 3220(40)  | 9668(9)  | 27(4) |
| Rb(1)  | 4867(1)   | 8216(2)   | 8565(1)  | 10(1) |
| Rb(2)  | 11823(1)  | 3480(2)   | 5646(1)  | 10(1) |
| Bi(1)  | 8156(1)   | 7678(1)   | 6806(1)  | 8(1)  |
| Bi(2)  | -17(1)    | 8073(1)   | 8930(1)  | 25(1) |
| P(1)   | 6876(2)   | 3346(4)   | 5680(1)  | 6(1)  |
| P(2)   | 7747(3)   | 3418(4)   | 8056(1)  | 10(1) |
| P(3)   | 2625(3)   | 3240(5)   | 9516(1)  | 21(1) |
| P(4)   | 12206(2)  | 8415(4)   | 7078(1)  | 7(1)  |
| O(1)   | 13128(8)  | 8701(13)  | 5115(3)  | 15(2) |
| O(2)   | 9259(8)   | 4796(14)  | 7696(4)  | 18(2) |
| O(3)   | -2254(10) | 4507(16)  | 8816(4)  | 30(1) |
| O(4)   | 2376(10)  | 10257(17) | 9569(5)  | 32(2) |
| O(5)   | 2594(8)   | 5484(12)  | 7137(3)  | 12(2) |
| O(6)   | 7968(10)  | 461(15)   | 8062(5)  | 35(2) |
| O(7)   | 6208(9)   | 4227(16)  | 7640(4)  | 27(2) |
| O(8)   | 5445(8)   | 4757(13)  | 6038(3)  | 12(1) |
| O(9)   | 8521(8)   | 4628(13)  | 6000(4)  | 15(2) |
| O(10)  | 1861(11)  | 4370(17)  | 8832(5)  | 38(1) |
| O(11)  | 11802(8)  | 9567(13)  | 7819(3)  | 14(2) |
| O(12)  | 10655(8)  | 8823(14)  | 6587(3)  | 18(2) |
| O(13)  | 6919(7)   | 300(12)   | 5858(3)  | 10(1) |
| O(14)  | 13620(8)  | 9917(12)  | 6739(3)  | 11(1) |
| O(15A) | 4120(20)  | 4550(40)  | 9816(10) | 40(1) |
| O(15B) | 4520(20)  | 3340(40)  | 9276(10) | 48(1) |
| O(16A) | 2190(20)  | 4600(30)  | 10187(9) | 30(1) |
| O(16B) | 1000(30)  | 4760(40)  | 9974(12) | 55(1) |

$U_{\text{eq}}$  is defined as one-third of the trace of the orthogonalized  $U_{ij}$  tensor.

Table S3. Selected bond distances (Å) and angles (deg) for the  $\beta$ -Li<sub>2</sub>RbBi(PO<sub>4</sub>)<sub>2</sub>.

|                            |           |                                 |           |
|----------------------------|-----------|---------------------------------|-----------|
| Li(1)-O(1) <sup>#1</sup>   | 1.903(14) | P(1)-O(1) <sup>#13</sup>        | 1.492(6)  |
| Li(1)-O(8)                 | 1.938(15) | P(1)-O(8)                       | 1.525(7)  |
| Li(1)-O(14) <sup>#1</sup>  | 2.012(14) | P(1)-O(13)                      | 1.564(6)  |
| Li(1)-O(13) <sup>#2</sup>  | 2.023(14) | P(1)-O(9)                       | 1.587(7)  |
| Li(2)-O(5) <sup>#5</sup>   | 1.855(15) | P(2)-O(6)                       | 1.494(8)  |
| Li(2)-O(11)                | 1.920(15) | P(2)-O(7)                       | 1.513(7)  |
| Li(2)-O(10) <sup>#5</sup>  | 1.959(16) | P(2)-O(3) <sup>#6</sup>         | 1.518(8)  |
| Li(2)-O(2) <sup>#2</sup>   | 2.024(15) | P(2)-O(2)                       | 1.570(7)  |
| Li(3)-O(7) <sup>#5</sup>   | 1.909(15) | P(3)-O(16A)                     | 1.475(16) |
| Li(3)-O(5) <sup>#5</sup>   | 1.919(15) | P(3)-O(15A)                     | 1.482(18) |
| Li(3)-O(14)                | 1.948(15) | P(3)-O(4) <sup>#9</sup>         | 1.513(9)  |
| Li(3)-O(8) <sup>#5</sup>   | 1.961(15) | P(3)-O(10)                      | 1.517(9)  |
| Li(4)-O(15B)               | 1.86(2)   | P(3)-O(15B)                     | 1.612(18) |
| Li(4)-O(4) <sup>#7</sup>   | 1.907(19) | P(3)-O(16B)                     | 1.76(2)   |
| Li(4)-O(3) <sup>#6</sup>   | 1.943(19) | P(4)-O(5) <sup>#6</sup>         | 1.507(6)  |
| Li(4)-O(16A) <sup>#7</sup> | 2.06(2)   | P(4)-O(14)                      | 1.519(7)  |
| Li(4)-O(15A)               | 2.18(3)   | P(4)-O(11)                      | 1.539(6)  |
| Li(4)-O(15A) <sup>#7</sup> | 2.18(3)   | P(4)-O(12)                      | 1.555(6)  |
| Li(4)-O(16B) <sup>#7</sup> | 2.65(3)   | O(1) <sup>#13</sup> -P(1)-O(8)  | 113.1(4)  |
| Rb(1)-O(15B)               | 2.80(2)   | O(1) <sup>#13</sup> -P(1)-O(13) | 109.1(4)  |
| Rb(1)-O(7)                 | 2.869(8)  | O(8)-P(1)-O(13)                 | 112.0(4)  |
| Rb(1)-O(15B) <sup>#2</sup> | 2.91(2)   | O(1) <sup>#13</sup> -P(1)-O(9)  | 108.1(4)  |
| Rb(1)-O(11) <sup>#1</sup>  | 2.905(7)  | O(8)-P(1)-O(9)                  | 106.7(4)  |
| Rb(1)-O(6) <sup>#2</sup>   | 2.925(9)  | O(13)-P(1)-O(9)                 | 107.5(3)  |
| Rb(1)-O(4)                 | 2.962(8)  | O(6)-P(2)-O(7)                  | 111.6(5)  |
| Rb(1)-O(3) <sup>#6</sup>   | 3.014(8)  | O(6)-P(2)-O(3) <sup>#6</sup>    | 110.6(5)  |
| Rb(1)-O(15A)               | 3.039(19) | O(7)-P(2)-O(3) <sup>#6</sup>    | 111.6(4)  |
| Rb(1)-O(10)                | 3.155(9)  | O(6)-P(2)-O(2)                  | 110.2(4)  |
| Rb(1)-O(15A) <sup>#8</sup> | 3.184(18) | O(7)-P(2)-O(2)                  | 107.8(4)  |
| Rb(1)-O(16A) <sup>#8</sup> | 3.373(16) | O(3) <sup>#6</sup> -P(2)-O(2)   | 104.8(4)  |
| Rb(2)-O(1) <sup>#9</sup>   | 2.807(6)  | O(16A)-P(3)-O(15A)              | 71.5(10)  |

|                 |           |                    |           |
|-----------------|-----------|--------------------|-----------|
| Rb(2)-O(9)      | 2.828(6)  | O(16A)-P(3)-O(4)#9 | 111.5(7)  |
| Rb(2)-O(1)      | 2.999(6)  | O(15A)-P(3)-O(4)#9 | 121.5(8)  |
| Rb(2)-O(5)#6    | 3.012(6)  | O(16A)-P(3)-O(10)  | 116.2(7)  |
| Rb(2)-O(14)#9   | 3.060(6)  | O(15A)-P(3)-O(10)  | 118.1(8)  |
| Rb(2)-O(8)#6    | 3.080(6)  | O(4)#9-P(3)-O(10)  | 111.8(5)  |
| Rb(2)-O(12)#9   | 3.081(7)  | O(16A)-P(3)-O(15B) | 117.7(9)  |
| Rb(2)-O(13)#10  | 3.137(6)  | O(15A)-P(3)-O(15B) | 46.3(10)  |
| Rb(2)-O(12)     | 3.350(7)  | O(4)#9-P(3)-O(15B) | 100.3(8)  |
| Bi(1)-O(12)     | 2.153(6)  | O(10)-P(3)-O(15B)  | 97.6(7)   |
| Bi(1)-O(9)      | 2.168(7)  | O(16A)-P(3)-O(16B) | 36.2(9)   |
| Bi(1)-O(2)      | 2.364(7)  | O(15A)-P(3)-O(16B) | 103.9(10) |
| Bi(1)-O(13)#2   | 2.406(6)  | O(4)#9-P(3)-O(16B) | 107.2(8)  |
| Bi(1)-O(6)#2    | 2.734(9)  | O(10)-P(3)-O(16B)  | 87.0(8)   |
| Bi(2)-O(16B)#12 | 2.36(2)   | O(15B)-P(3)-O(16B) | 148.1(11) |
| Bi(2)-O(10)     | 2.411(9)  | O(5)#6-P(4)-O(14)  | 110.9(4)  |
| Bi(2)-O(4)      | 2.509(8)  | O(5)#6-P(4)-O(11)  | 110.4(4)  |
| Bi(2)-O(3)      | 2.553(8)  | O(14)-P(4)-O(11)   | 111.2(4)  |
| Bi(2)-O(16A)#12 | 2.550(16) | O(5)#6-P(4)-O(12)  | 109.7(4)  |
| Bi(2)-O(6)#4    | 2.573(9)  | O(14)-P(4)-O(12)   | 107.3(4)  |
| Bi(2)-O(11)#1   | 2.673(6)  | O(11)-P(4)-O(12)   | 107.2(4)  |
| Bi(2)-O(16B)    | 2.68(2)   |                    |           |

Symmetry transformations used to generate equivalent atoms:

|     |                     |     |                     |     |                   |
|-----|---------------------|-----|---------------------|-----|-------------------|
| #1  | $x-1, y, z$         | #2  | $x, y+1, z$         | #3  | $x-1, y-1, z$     |
| #4  | $x-1, y+1, z$       | #5  | $x+1, y+1, z$       | #6  | $x+1, y, z$       |
| #7  | $-x+1, y-1/2, -z+2$ | #8  | $-x+1, y+1/2, -z+2$ | #9  | $x, y-1, z$       |
| #10 | $-x+2, y+1/2, -z+1$ | #11 | $x+1, y-1, z$       | #12 | $-x, y+1/2, -z+2$ |
| #13 | $-x+2, y-1/2, -z+1$ | #14 | $-x, y-1/2, -z+2$   |     |                   |

Table S4. Anisotropic displacement parameters ( $\text{Å}^2 \times 10^3$ ) for the  $\beta\text{-Li}_2\text{RbBi}(\text{PO}_4)_2$ .

|        | U11   | U22   | U33   | U23    | U13    | U12    |
|--------|-------|-------|-------|--------|--------|--------|
| Li(1)  | 7(2)  | 6(2)  | 7(2)  | 0(1)   | 0(1)   | 0(1)   |
| Li(2)  | 10(2) | 10(2) | 10(2) | 0(1)   | 0(1)   | 0(1)   |
| Li(3)  | 9(2)  | 9(2)  | 9(2)  | 0(1)   | 0(1)   | 0(1)   |
| Li(4)  | 34(8) | 21(9) | 24(8) | 6(8)   | -14(7) | -6(8)  |
| Rb(1)  | 6(1)  | 12(1) | 12(1) | -1(1)  | 3(1)   | 0(1)   |
| Rb(2)  | 11(1) | 10(1) | 10(1) | 0(1)   | 3(1)   | 2(1)   |
| Bi(1)  | 9(1)  | 9(1)  | 6(1)  | 0(1)   | -1(1)  | 1(1)   |
| Bi(2)  | 25(1) | 24(1) | 26(1) | -3(1)  | -4(1)  | 1(1)   |
| P(1)   | 8(1)  | 5(1)  | 5(1)  | 1(1)   | -1(1)  | -2(1)  |
| P(2)   | 10(1) | 10(1) | 11(1) | 4(1)   | -1(1)  | 0(1)   |
| P(3)   | 25(1) | 25(1) | 12(1) | 2(1)   | -4(1)  | -16(1) |
| P(4)   | 7(1)  | 5(1)  | 10(1) | -3(1)  | 2(1)   | -2(1)  |
| O(1)   | 18(3) | 18(3) | 9(3)  | -8(2)  | -5(2)  | -3(3)  |
| O(2)   | 17(3) | 22(3) | 14(3) | 10(3)  | -3(3)  | -5(3)  |
| O(3)   | 31(1) | 30(1) | 28(2) | 2(1)   | 1(1)   | 1(1)   |
| O(4)   | 27(4) | 38(5) | 32(4) | 7(4)   | -3(4)  | -3(4)  |
| O(5)   | 8(3)  | 9(3)  | 17(3) | 2(3)   | -4(3)  | 3(2)   |
| O(6)   | 32(4) | 19(4) | 53(5) | 14(4)  | 7(4)   | 2(3)   |
| O(7)   | 16(3) | 39(4) | 27(4) | -10(3) | -8(3)  | 4(3)   |
| O(8)   | 13(1) | 12(1) | 13(1) | 1(1)   | 0(1)   | 2(1)   |
| O(9)   | 13(1) | 11(3) | 19(3) | -4(3)  | -7(3)  | -7(3)  |
| O(10)  | 40(1) | 38(2) | 37(2) | 0(1)   | -1(1)  | 1(1)   |
| O(11)  | 21(3) | 15(3) | 7(3)  | -4(2)  | 6(3)   | 4(3)   |
| O(12)  | 13(3) | 28(4) | 14(3) | 8(3)   | -4(3)  | -3(3)  |
| O(13)  | 10(1) | 10(1) | 10(1) | 1(1)   | -1(1)  | 0(1)   |
| O(14)  | 11(1) | 10(1) | 11(1) | 0(1)   | 0(1)   | -1(1)  |
| O(15A) | 40(2) | 40(2) | 40(2) | 1(1)   | 0(1)   | 0(1)   |
| O(15B) | 48(2) | 48(2) | 49(2) | 0(1)   | 1(1)   | 0(1)   |
| O(16A) | 30(2) | 30(2) | 29(2) | -1(1)  | 1(1)   | 0(1)   |
| O(16B) | 55(2) | 55(2) | 55(2) | 0(1)   | 2(1)   | 0(1)   |

---

**Table S5.** Bond valence analysis of the  $\beta$ -Li<sub>2</sub>RbBi(PO<sub>4</sub>)<sub>2</sub>.

---

| $\beta$ -Li <sub>2</sub> RbBi(PO <sub>4</sub> ) <sub>2</sub> |       |       |       |       |       |       |       |       |
|--------------------------------------------------------------|-------|-------|-------|-------|-------|-------|-------|-------|
| Atom                                                         | Li(1) | Li(2) | Li(3) | Li(4) | Rb(1) | Rb(2) | Bi(1) | Bi(2) |
| $\Sigma$ Cations                                             | 1.04  | 1.13  | 1.13  | 1.09  | 1.26  | 1.19  | 2.73  | 2.56  |
| Atom                                                         | P(1)  | P(2)  | P(3)  | P(4)  | O(1)  | O(2)  | O(3)  | O(4)  |
| $\Sigma$ Cations                                             | 4.76  | 4.99  | 4.77  | 4.90  | 2.02  | 1.80  | 1.95  | 2.05  |
| Atom                                                         | O(5)  | O(6)  | O(7)  | O(8)  | O(9)  | O(10) | O(11) | O(12) |
| $\Sigma$ Cations                                             | 2.08  | 1.96  | 1.77  | 1.89  | 2.07  | 2.04  | 1.87  | 2.15  |
| Atom                                                         | O(13) | O(14) | O(15) | O(16) |       |       |       |       |
| $\Sigma$ Cations                                             | 1.86  | 1.87  | 1.88  | 1.79  |       |       |       |       |

---



**Table S6.** SHG response of all the Bi-based phosphates.

| materials                                                       | Group                    | SHG( $\times$ KDP) | ref              |
|-----------------------------------------------------------------|--------------------------|--------------------|------------------|
| $\text{Li}_2\text{KBi}(\text{PO}_4)_2$                          | $P2_1$                   | 5                  | 1                |
| <b><math>\beta\text{-Li}_2\text{RbBi}(\text{PO}_4)_2</math></b> | <b><math>P2_1</math></b> | <b>5.2</b>         | <b>this work</b> |
| $\alpha\text{-Li}_2\text{RbBi}(\text{PO}_4)_2$                  | $C2$                     | 3.1                | 1                |
| $\text{Li}_2\text{CsBi}(\text{PO}_4)_2$                         | $C2$                     | 2.5                | 1                |
| $\text{CsBi}(\text{P}_4\text{O}_{12})$                          | $\bar{I}A_3d$            | 4.2                | 2                |
| $\text{K}_3\text{SrBi}(\text{P}_2\text{O}_7)_2$                 | $P2_1$                   | 4                  | 3                |
| $\text{Bi}_{32}\text{Cd}_3\text{P}_{10}\text{O}_{76}$           | $C2$                     | 4                  | 4                |
| $\text{Cd}_3\text{Bi}(\text{PO}_4)_3$                           | $\bar{I}A_3d$            | 3.8                | 5                |
| $\text{Pb}_3\text{Bi}(\text{PO}_4)_3$                           | $\bar{I}A_3d$            | 3                  | 5                |
| $\text{Sr}_3\text{Bi}(\text{PO}_4)_3$                           | $\bar{I}A_3d$            | 2.85               | 5                |
| $\text{Rb}_3\text{PbBi}(\text{P}_2\text{O}_7)_2$                | $P2_1$                   | 2.8                | 6                |
| $\text{Rb}_3\text{BaBi}(\text{P}_2\text{O}_7)_2$                | $P2_1$                   | 2.5                | 7                |
| $\text{Bi}_6\text{ZnO}_7(\text{PO}_4)_2$                        | $I2$                     | 2.5                | 8                |
| $\text{Rb}_3\text{SrBi}(\text{P}_2\text{O}_7)_2$                | $P2_1$                   | 2.1                | 3                |
| $\text{Cs}_3\text{PbBi}(\text{P}_2\text{O}_7)_2$                | $P2_12_12_1$             | 1.1                | 6                |
| $\text{Cs}_3\text{BaBi}(\text{P}_2\text{O}_7)_2$                | $P2_12_12_1$             | 0.8                | 7                |
| $\text{RbPbBi}_2(\text{PO}_4)_3$                                | $P3_12_1$                | 0.7                | 9                |
| $\text{Ca}_3\text{Bi}(\text{PO}_4)_3$                           | $\bar{I}A_3d$            | 0.64               | 5                |
| $\text{Ba}_3\text{Bi}(\text{PO}_4)_3$                           | $\bar{I}A_3d$            | 0.5                | 10               |
| $\text{K}_6\text{Bi}_{13}(\text{PO}_4)_{15}$                    | $C2$                     | weak               | 11               |

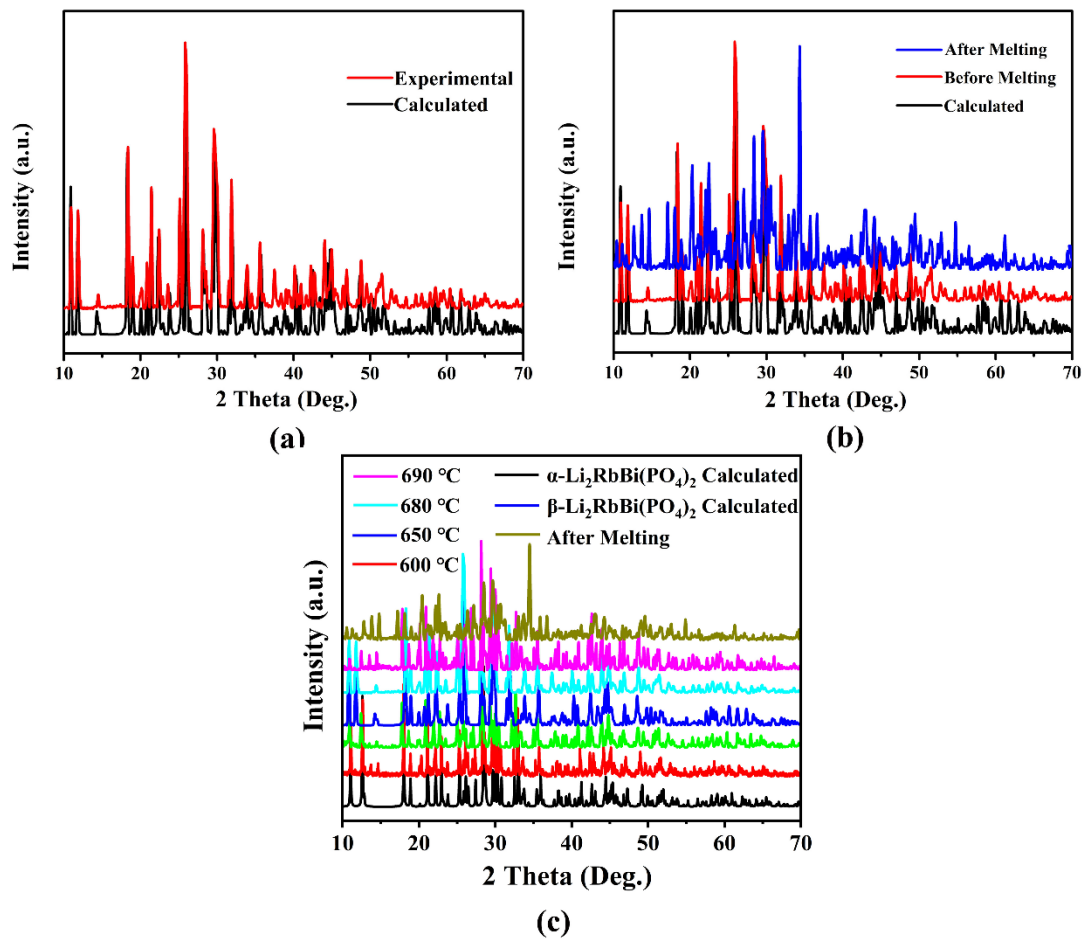

**Figure S1.** XRD patterns of  $\beta$ - $\text{Li}_2\text{RbBi}(\text{PO}_4)_2$ . (a) Experimental and calculated XRD patterns of the  $\beta$ - $\text{Li}_2\text{RbBi}(\text{PO}_4)_2$ . (b) XRD patterns of the  $\beta$ - $\text{Li}_2\text{RbBi}(\text{PO}_4)_2$  before and after melting. (c) XRD phase analysis of the sintered samples at different temperatures.

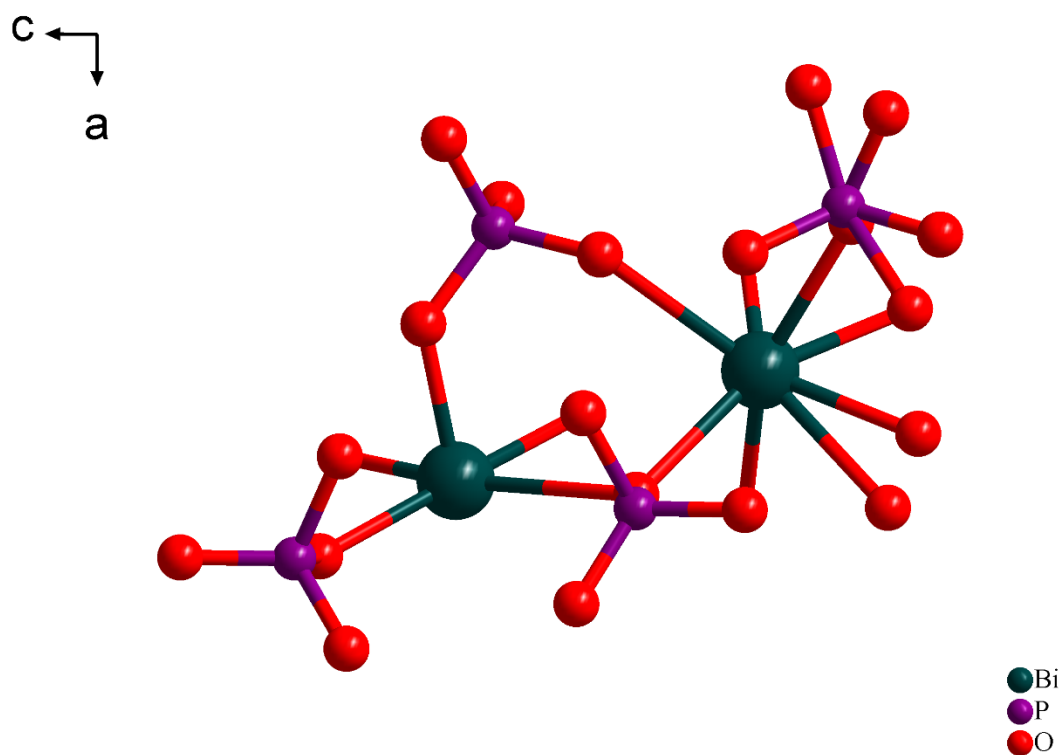

**Figure S2.** Coordinated environment of Bi atoms in the  $\beta$ - $\text{Li}_2\text{RbBi}(\text{PO}_4)_2$ .

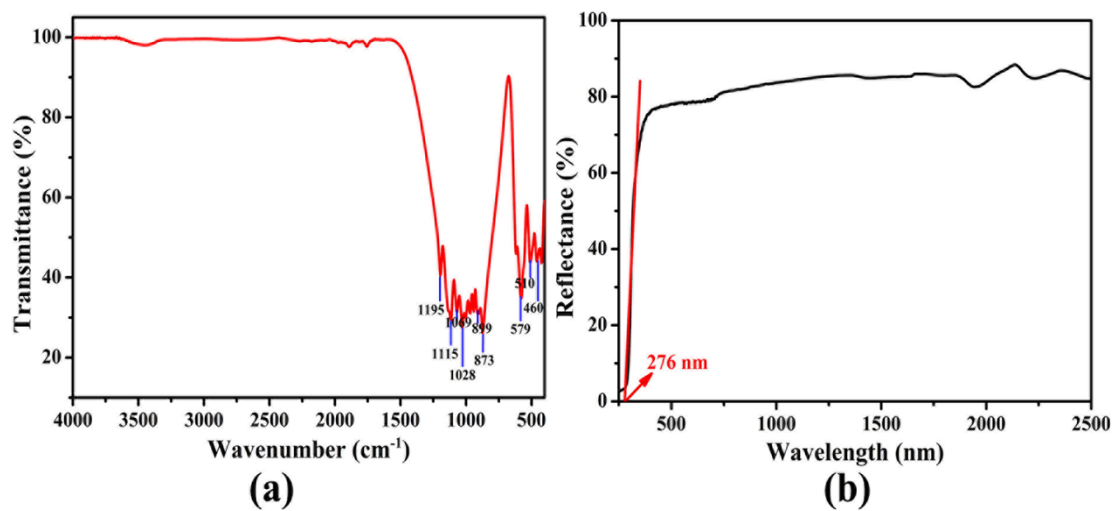

**Figure S3.** (a,b) IR (a) and UV-Vis-NIR (b) diffuse reflectance spectra of the  $\beta$ -Li<sub>2</sub>RbBi(PO<sub>4</sub>)<sub>2</sub>.

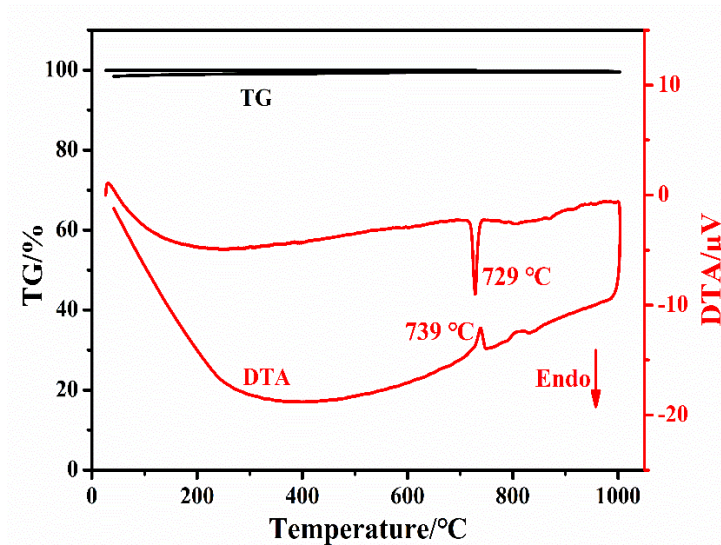

**Figure S4.** TG-DTA analysis of the  $\beta\text{-Li}_2\text{RbBi}(\text{PO}_4)_2$ .

---

## References

1. M. Wen, C. Hu, H. Wu, Z. Yang, H. H. Yu and S. Pan, Three non-centrosymmetric bismuth phosphates,  $\text{Li}_2\text{ABi}(\text{PO}_4)_2$  (A = K, Rb, and Cs): Effects of Cations on the Crystal Structure and SHG Response, *Inorganic Chemistry Frontiers*, 2020, **7**, 3364-3370.
2. Y. Lian, T. Yu, L. Xiong, L. Wu and L. Chen, Cyclophosphate  $\text{MBi}(\text{P}_4\text{O}_{12})$  (M = Cs, Rb): Structure Change Giving Rise to Property Enhancement, *Crystal Growth & Design*, 2020, **20**, 6205-6210.
3. S. Liu, B. Zhang, H. Wu, H. Yu, Z. Hu, J. Wang and Y. Wu, Ultraviolet Nonlinear Optical Crystals  $\text{A}_3\text{SrBi}(\text{P}_2\text{O}_7)_2$  (A = K, Rb) with Large Second Harmonic Generation Responses, *Inorganic Chemistry Frontiers*, 2021, **8**, 2061-2067.
4. J. Wang, B. Xiong, H. Wu, H. Yu, Z. Hu, J. Wang and Y. Wu,  $\text{Bi}_{32}\text{Cd}_3\text{P}_{10}\text{O}_{76}$ : A New Congruently Melting Nonlinear Optical Crystal with a Large SHG Response and a Wide Transparent Region, *Inorganic Chemistry Frontiers*, 2021, **8**, 344-351.
5. P. P. Sahoo and T. N. Guru Row, Crystal Chemistry of the Noncentrosymmetric Eulytites:  $\text{A}_3\text{Bi}(\text{XO}_4)_3$  (X = V, A = Pb; X = P, A = Ca, Cd, Sr, Pb), *Inorganic Chemistry*, 2010, **49**, 10013-10021.
6. X. Lu, Z. Chen, X. Shi, Q. Jing and M.-H. Lee, Two Pyrophosphates with Large Birefringences and Second-Harmonic Responses as Ultraviolet Nonlinear Optical Materials, *Angewandte Chemie International Edition*, 2020, **59**, 17648-17656.
7. L. Qi, Z. Chen, X. Shi, X. Zhang, Q. Jing, N. Li, Z. Jiang, B. Zhang and M.-H. Lee,  $\text{A}_3\text{BBI}(\text{P}_2\text{O}_7)_2$  (A = Rb, Cs; B = Pb, Ba): Isovalent Cation Substitution to Sustain Large Second-Harmonic Generation Responses, *Chemistry of Materials*, 2020, **32**, 8713-8723.
8. J. Olchowka, M. Colmont, A. Aliev, T. T. Tran, P. S. Halasyamani, H. Hagemann and O. Mentré, Original Oxo-centered Bismuth Oxo-arsenates; Critical Effect of  $\text{PO}_4$  for  $\text{AsO}_4$  Substitution, *CrystEngComm*, 2017, **19**, 936-945.
9. M. Wen, H. Wu, Z. Yang, X. Wu and S. Pan, An Alkali Metal Phosphate  $\text{RbPbBi}_2(\text{PO}_4)_3$  with Three Kinds of Disorder: the Effect of Isolated Soft Cation Units on the Crystal Structure, *Inorganic Chemistry Frontiers*, 2019, **6**, 2050-2054.
10. W. Zhang, X. Lin, H. Zhang, J. Wang, C. Lin, Z. He and W. Cheng, Lone electron-pair enhancement of SHG responses in Eulytite-type Compounds:  $\text{All}_3\text{MIII}(\text{PO}_4)_3$  (A = Pb, M = Bi; A = Ba, M = Bi, La), *Dalton Transactions*, 2010, **39**, 1546-1551.
11. R. Liu, H. Wu, H. Yu, Z. Hu, J. Wang and Y. Wu,  $\text{K}_6\text{Bi}_{13}(\text{PO}_4)_{15}$ ,  $\text{K}_5\text{Bi}(\text{P}_2\text{O}_7)_2$ ,  $\text{A}_5\text{Bi}_5(\text{PO}_4)_4(\text{P}_2\text{O}_7)_2$  (A=K, Rb): New Bismuth Phosphates with Different Condensed Phosphate groups, *Journal of Alloys and Compounds*, 2022, **896**, 163066.
